# Supplementary material for: Prevalence and Correlates of Overweight, Obesity and Physical Activity in Italian Children and Adolescents from Lombardy, Italy
Source: MDPI journal article supplement (doi:10.3390/nu14112258), 2022-05-28
Supplement: s1 [file s1]

**Supplementary Table S3.** Odds ratios (OR) and corresponding 95% confidence intervals (CI) for childhood overweight (including obesity) stratified by sex, according to selected socio-demographic and family characteristics. Lombardy, 2018-2019.

| Characteristics                            | Overweight <sup>1</sup>            |                         |                         |                         |
|--------------------------------------------|------------------------------------|-------------------------|-------------------------|-------------------------|
|                                            | OR (95% CI)                        |                         |                         |                         |
|                                            | OKKio alla Salute<br>Age 8-9 years |                         | HBSC<br>Age 11-15 years |                         |
|                                            | Males                              | Females                 | Males                   | Females                 |
| <b>Total</b>                               | <b>1565</b>                        | <b>1456</b>             | <b>1424</b>             | <b>1409</b>             |
| Age category                               |                                    |                         |                         |                         |
| 11                                         | -                                  | -                       | 1.00 <sup>2</sup>       | 1.00 <sup>2</sup>       |
| 13                                         | -                                  | -                       | 1.23 (0.87-1.74)        | 0.99 (0.62-1.57)        |
| 15                                         | -                                  | -                       | 0.84 (0.58-1.24)        | 0.67 (0.41-1.09)        |
| P for trend                                |                                    |                         | 0.327                   | 0.075                   |
| Highest parental education                 |                                    |                         |                         |                         |
| Low                                        | 1.00 <sup>2</sup>                  | 1.00 <sup>2</sup>       | 1.00 <sup>2</sup>       | 1.00 <sup>2</sup>       |
| Intermediate                               | <b>0.68 (0.49-0.95)</b>            | 0.75 (0.54-1.04)        | 0.71 (0.41-1.23)        | 0.81 (0.41-1.61)        |
| High                                       | <b>0.63 (0.45-0.89)</b>            | <b>0.46 (0.31-0.66)</b> | 0.57 (0.32-1.02)        | 0.57 (0.27-1.19)        |
| P for trend                                | <b>0.016</b>                       | <b>&lt;0.001</b>        | 0.052                   | 0.083                   |
| Family socio-economic status               |                                    |                         |                         |                         |
| Low                                        | 1.00 <sup>2</sup>                  | 1.00 <sup>2</sup>       | 1.00 <sup>2</sup>       | 1.00 <sup>2</sup>       |
| Middle                                     | <b>0.73 (0.56-0.95)</b>            | <b>0.69 (0.52-0.91)</b> | 0.96 (0.68-1.35)        | 0.73 (0.48-1.11)        |
| High                                       | <b>0.40 (0.25-0.63)</b>            | 0.71 (0.47-1.05)        | 0.80 (0.53-1.21)        | <b>0.46 (0.26-0.79)</b> |
| P for trend                                | <b>&lt;0.001</b>                   | <b>0.022</b>            | 0.282                   | <b>0.005</b>            |
| Nationality                                |                                    |                         |                         |                         |
| Italian                                    | 1.00 <sup>2</sup>                  | 1.00 <sup>2</sup>       | 1.00 <sup>2</sup>       | 1.00 <sup>2</sup>       |
| Other                                      | <b>1.43 (1.05-1.94)</b>            | 1.02 (0.72-1.44)        | 1.08 (0.60-1.96)        | 1.98 (0.86-4.59)        |
| Birth weight (gr) <sup>3</sup>             |                                    |                         |                         |                         |
| <2500                                      | 1.00 <sup>2</sup>                  | 1.00 <sup>2</sup>       |                         |                         |
| 2500-3300                                  | <b>2.06 (1.08-3.94)</b>            | 0.74 (0.47-1.16)        |                         |                         |
| >3300                                      | <b>3.31 (1.74-6.29)</b>            | 1.14 (0.72-1.81)        |                         |                         |
| P for trend                                | <b>&lt;0.001</b>                   | <b>0.040</b>            |                         |                         |
| Parental BMI <sup>3</sup>                  |                                    |                         |                         |                         |
| Both parents normal weight                 | 1.00 <sup>2</sup>                  | 1.00 <sup>2</sup>       |                         |                         |
| At least one parent overweight (not obese) | <b>2.23 (1.64-3.03)</b>            | <b>1.72 (1.23-2.39)</b> |                         |                         |
| At least one parent obese                  | <b>3.73 (2.56-5.44)</b>            | <b>4.15 (2.81-6.14)</b> |                         |                         |
| P for trend                                | <b>&lt;0.001</b>                   | <b>&lt;0.001</b>        |                         |                         |

<sup>1</sup> ORs for overweight (overweight/obesity vs. normal weight) were calculated in unconditional multiple logistic regression models, after adjustment for sex, parents' highest level of education and physical activity (low, intermediate, high); HBSC data were further adjusted for age. Thin children and adolescents were excluded from the analyses. Estimates in bold type are significant at 0.05.

<sup>2</sup> Reference category.

<sup>3</sup> Information on baby's birth weight and parents' BMI were not available for the HBSC survey.
