# Supplementary material for: Prevalence and Correlates of Overweight, Obesity and Physical Activity in Italian Children and Adolescents from Lombardy, Italy
Source: MDPI journal article supplement (doi:10.3390/nu14112258), 2022-05-28
Supplement: s1 [file s1]

**Supplementary Table S1.** Frequencies and percent distribution (%) of overweight (including obesity) and poor physical activity according to selected socio-demographic and family characteristics. Lombardy, 2018-2019.

| Characteristics                            | OKKio alla Salute<br>Age 8-9 years |                 |                                             | HBSC<br>Age 11-15 years |                 |                                                |
|--------------------------------------------|------------------------------------|-----------------|---------------------------------------------|-------------------------|-----------------|------------------------------------------------|
|                                            | No.                                | Overweight<br>% | Poor<br>physical<br>activity <sup>1</sup> % | No.                     | Overweight<br>% | Poor<br>physical<br>activity <sup>1</sup><br>% |
| <b>Total, No. (%)</b>                      | 3,093                              | 22.4            | 32.9                                        | 2,916                   | 14.0            | 32.8                                           |
| Sex                                        |                                    |                 |                                             |                         |                 |                                                |
| Females                                    | 1498                               | 21.7            | 38.9                                        | 1455                    | 9.7             | 38.0                                           |
| Males                                      | 1595                               | 23.0            | 27.2                                        | 1461                    | 18.3            | 27.6                                           |
| Age category                               |                                    |                 |                                             |                         |                 |                                                |
| 11                                         | -                                  | -               | -                                           | 859                     | 14.1            | 25.1                                           |
| 13                                         | -                                  | -               | -                                           | 1003                    | 16.3            | 31.8                                           |
| 15                                         | -                                  | -               | -                                           | 1054                    | 11.8            | 40.0                                           |
| Highest parental education                 |                                    |                 |                                             |                         |                 |                                                |
| Low                                        | 504                                | 29.6            | 38.4                                        | 175                     | 18.3            | 42.4                                           |
| Intermediate                               | 1422                               | 22.4            | 32.1                                        | 1160                    | 14.2            | 34.5                                           |
| High                                       | 1046                               | 18.3            | 30.2                                        | 866                     | 11.0            | 28.2                                           |
| Family socio-economic status               |                                    |                 |                                             |                         |                 |                                                |
| Low                                        | 1086                               | 27.7            | 35.7                                        | 614                     | 17.9            | 40.8                                           |
| Intermediate                               | 1375                               | 20.5            | 29.4                                        | 1412                    | 14.5            | 32.1                                           |
| High                                       | 452                                | 15.7            | 34.8                                        | 827                     | 10.4            | 28.2                                           |
| Nationality                                |                                    |                 |                                             |                         |                 |                                                |
| Italian                                    | 2474                               | 21.0            | 30.5                                        | 2775                    | 13.8            | 32.8                                           |
| Other                                      | 503                                | 28.1            | 42.8                                        | 118                     | 19.5            | 31.3                                           |
| Birth weight (gr) <sup>2</sup>             |                                    |                 |                                             |                         |                 |                                                |
| <2500                                      | 249                                | 16.7            | 36.6                                        | -                       | -               | -                                              |
| 2500-3300                                  | 1426                               | 19.0            | 32.8                                        | -                       | -               | -                                              |
| >3300                                      | 1265                               | 27.5            | 31.8                                        | -                       | -               | -                                              |
| Parental BMI <sup>2</sup>                  |                                    |                 |                                             |                         |                 |                                                |
| Both parents normal weight                 | 1074                               | 12.9            | 29.9                                        | -                       | -               | -                                              |
| At least one parent overweight (not obese) | 1250                               | 23.2            | 32.5                                        | -                       | -               | -                                              |
| At least one parent obese                  | 423                                | 38.9            | 34.2                                        | -                       | -               | -                                              |

<sup>1</sup> We excluded 45 children from OKKio alla Salute and 24 from HBSC because they did not provide information on physical activity.

<sup>2</sup> Information on baby's birth weight and parents' BMI were not available for the HBSC survey.
