# Supplementary material for: Prevalence and Correlates of Overweight, Obesity and Physical Activity in Italian Children and Adolescents from Lombardy, Italy
Source: MDPI journal article supplement (doi:10.3390/nu14112258), 2022-05-28
Supplement: s1 [file s1]

**Supplementary Table S2.** Frequencies and percent distribution (%) of overweight (including obesity) and poor physical activity according to selected lifestyle habits and other characteristics. Lombardy, 2018-2019.

| Characteristics                                                          | OKKio alla Salute<br>Age 8-9 years |                 |                                          | HBSC<br>Age 11-15 years |                 |                                          |
|--------------------------------------------------------------------------|------------------------------------|-----------------|------------------------------------------|-------------------------|-----------------|------------------------------------------|
|                                                                          | No.                                | Overweight<br>% | Poor physical<br>activity <sup>1</sup> % | No.                     | Overweight<br>% | Poor physical<br>activity <sup>1</sup> % |
| Physical activity (Days/week) <sup>2</sup>                               |                                    |                 |                                          |                         |                 |                                          |
| Low                                                                      | 1002                               | 26.2            | -                                        | 949                     | 15.8            | -                                        |
| Moderate                                                                 | 891                                | 22.4            | -                                        | 568                     | 14.4            | -                                        |
| High                                                                     | 1155                               | 19.2            | -                                        | 1375                    | 12.4            | -                                        |
| Time spent watching TV (approximate tertiles) <sup>3</sup>               |                                    |                 |                                          |                         |                 |                                          |
| Low                                                                      | 1193                               | 20.3            | 31.3                                     | 1129                    | 11.2            | 29.7                                     |
| Intermediate                                                             | 593                                | 22.3            | 29.1                                     | 752                     | 12.1            | 28.3                                     |
| High                                                                     | 887                                | 24.6            | 35.9                                     | 969                     | 18.9            | 39.5                                     |
| Time spent playing with the computer (approximate tertiles) <sup>4</sup> |                                    |                 |                                          |                         |                 |                                          |
| Low                                                                      | 859                                | 18.8            | 30.4                                     | 932                     | 9.1             | 33.0                                     |
| Intermediate                                                             | 945                                | 21.5            | 31.3                                     | 961                     | 13.7            | 30.8                                     |
| High                                                                     | 873                                | 27.1            | 34.7                                     | 969                     | 19.0            | 34.2                                     |
| BMI                                                                      |                                    |                 |                                          |                         |                 |                                          |
| Thin                                                                     | 72                                 | -               | 43.8                                     | 83                      | -               | 39.8                                     |
| Normal weight                                                            | 2329                               | -               | 30.9                                     | 2424                    | -               | 31.8                                     |
| Overweight                                                               | 545                                | -               | 36.9                                     | 356                     | -               | 35.5                                     |
| Obese                                                                    | 147                                | -               | 43.8                                     | 52                      | -               | 49.0                                     |

<sup>1</sup> We excluded 45 children from OKKio alla Salute and 24 from HBSC because they did not provide information on physical activity.

<sup>2</sup> In both surveys: <3 days per week/3 days per week /≥4 days per week.

<sup>3</sup> In OKKio alla Salute: <1.17 hours per day/1.17 -1.54 hours/≥ 1.55 hours per day. In HBSC: <1.17 hours per day/1.17 -2.22 hours/≥2.23 hours per day.

<sup>4</sup> In OKKio alla Salute: <34 minutes per day /34 minutes-1.16 hours /≥ 1.17 hours per day. In HBSC: <38 minutes per day/38 minutes -1.51 hours/≥1.52 hours per day.
